# Supplementary material for: Algae Bloom and Decomposition Changes the Phosphorus Cycle Pattern in Taihu Lake
Source: MDPI journal article supplement (doi:10.3390/w14223607), 2022-11-09
Supplement: s1 [file s1]

Archive with 1 entries (1 files):
- water-1960419-supplementary.pdf
