# Supplementary material for: Algae Bloom and Decomposition Changes the Phosphorus Cycle Pattern in Taihu Lake
Source: MDPI journal article supplement (doi:10.3390/w14223607), 2022-11-09
Supplement: s1 [file s1 › water-1960419-supplementary.pdf]

**Supplementary Data**

# **Algae Bloom and Decomposition Changes the Phosphorus Cycle Pattern in Taihu Lake**

**Chaonan Han \*, Yan Dai, Ningning Sun, Hao Wu, Yu Tang and Tianhao Dai**

School of Civil Engineering, Nanjing Forestry University, Nanjing 210037, China

\* Correspondence: hcn\_125@163.com; Tel.: +86-13022593296

Tables:

Table S1. Water quality parameters of Taihu Lake.

Table S2. Molar Fe/P ratios and  $\text{PO}_4^{3-}$ ,  $\text{Fe}^{2+}$  diffusion fluxes from pore water to overlying water of Taihu Lake.

Table S3. Abundance and diversity index of sediment bacteria communities of Taihu Lake.

Figures:

Figure S1. Concentrations of P forms in suspended particles of Taihu Lake

Figure S2. Heatmap plot of the top thirty bacterium at genus level in surface sediments of Taihu Lake.

Figure S3. The Proportion of IP and OP in S-TP in suspended particles and sediments of Taihu Lake

**Table S1.** Water quality parameters of Taihu Lake.

| Site           | pH  | DO (mg/L) | Temperature (°C) | EC (μs/cm) |
|----------------|-----|-----------|------------------|------------|
| East of lake   | 7.8 | 9.4       | 30.5             | 355        |
| Middle of lake | 7.7 | 7.3       | 30.8             | 382        |
| Meiliang bay   | 8.2 | 13.5      | 31.5             | 364        |

**Table S2.** Molar Fe/P ratios and PO<sub>4</sub><sup>3-</sup>, Fe<sup>2+</sup> diffusion fluxes from pore water to overlying water of Taihu Lake.

| Site           | Molar Fe/P ratios | PO <sub>4</sub> <sup>3-</sup> flux (mg/m <sup>2</sup> ·d) | Fe <sup>2+</sup> flux (mg/m <sup>2</sup> ·d) |
|----------------|-------------------|-----------------------------------------------------------|----------------------------------------------|
| East of Lake   | 2.01~12.98 (8.06) | 0.24                                                      | 1.74                                         |
| Middle of lake | 1.02~5.54 (2.26)  | 0.37                                                      | 0.22                                         |
| Meiliang bay   | 1.03~7.24 (1.94)  | 0.45                                                      | 0.65                                         |

**Table S3.** Abundance and diversity index of sediment bacteria communities of Taihu Lake.

| Site           | Shannon | Simpson | ACE      | Chao     | Coverage |
|----------------|---------|---------|----------|----------|----------|
| East of lake   | 6.187   | 0.0055  | 2462.189 | 2441.253 | 0.984    |
| Middle of lake | 6.418   | 0.0040  | 2561.551 | 2515.113 | 0.985    |
| Meiliang bay   | 6.321   | 0.0057  | 2675.150 | 2690.066 | 0.981    |

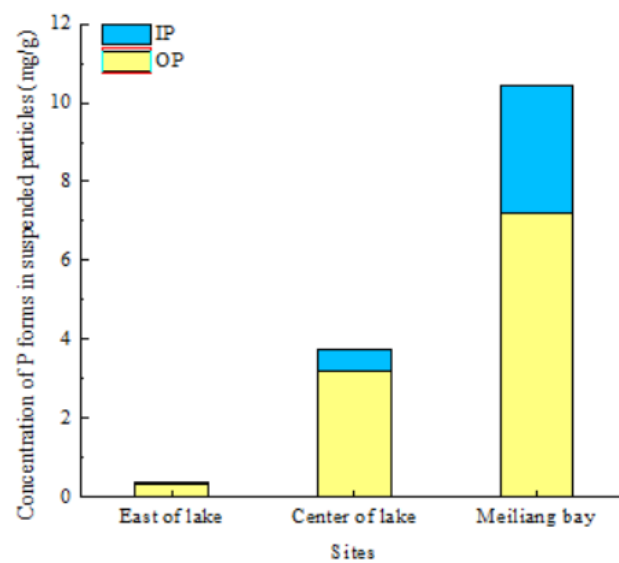

**Figure S1.** Concentrations of P forms in suspended particles of Taihu Lake

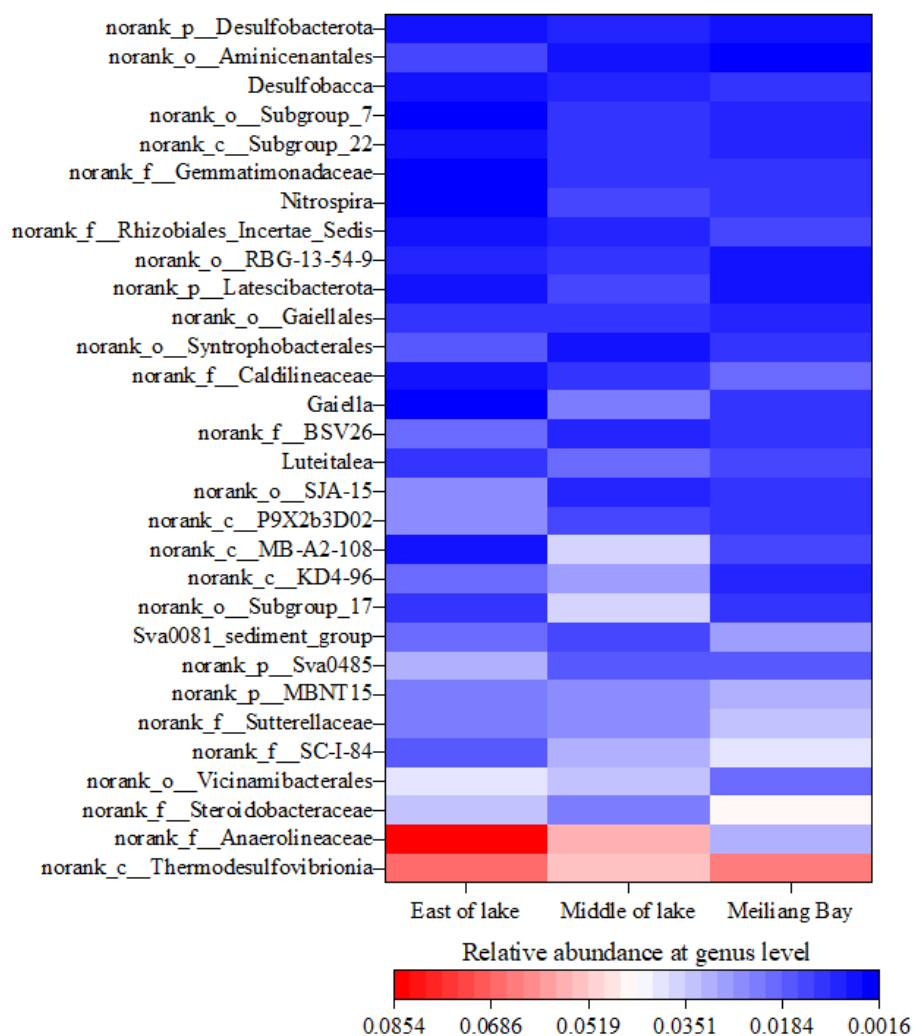

Figure S2. Heatmap plot of the top thirty bacterium at genus level in surface sediments of Taihu Lake.

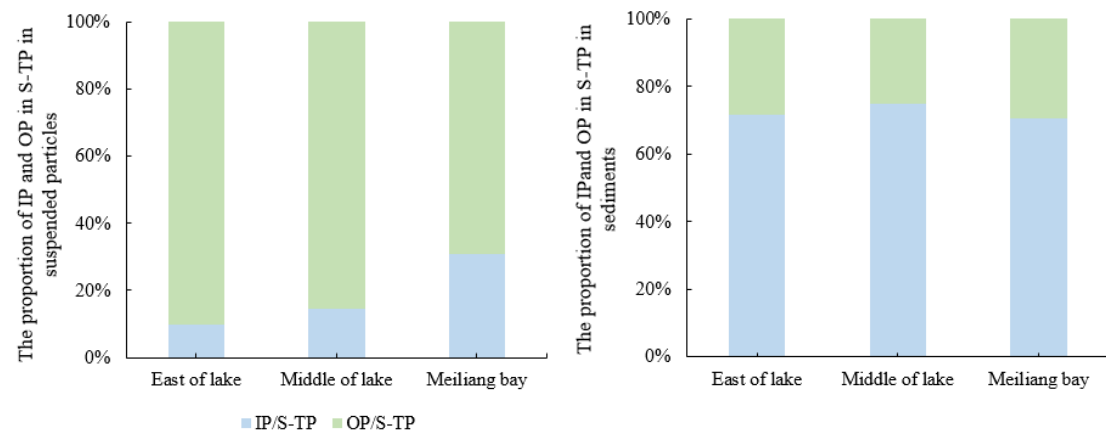

**Figure S3.** The Proportion of IP and OP in S-TP in suspended particles and sediments of Taihu Lake
